# Supplementary material
Source: Springer Nature journal article supplement (https://www.springermedizin.de/resource/supplementary/13075_2010_3038_MOESM2_ESM.pdf/9693394)

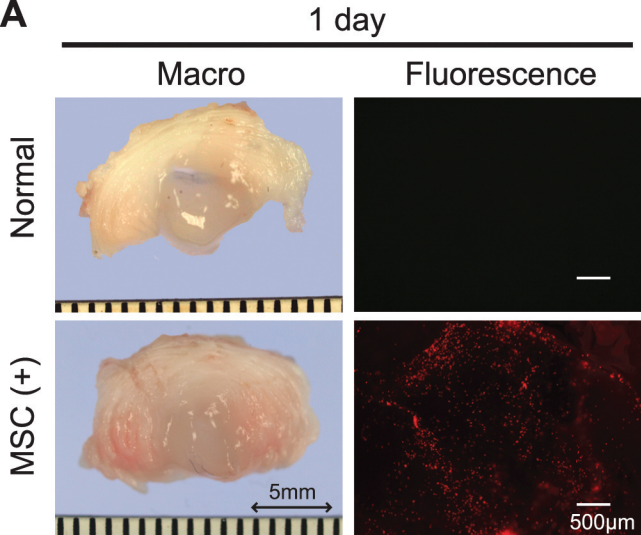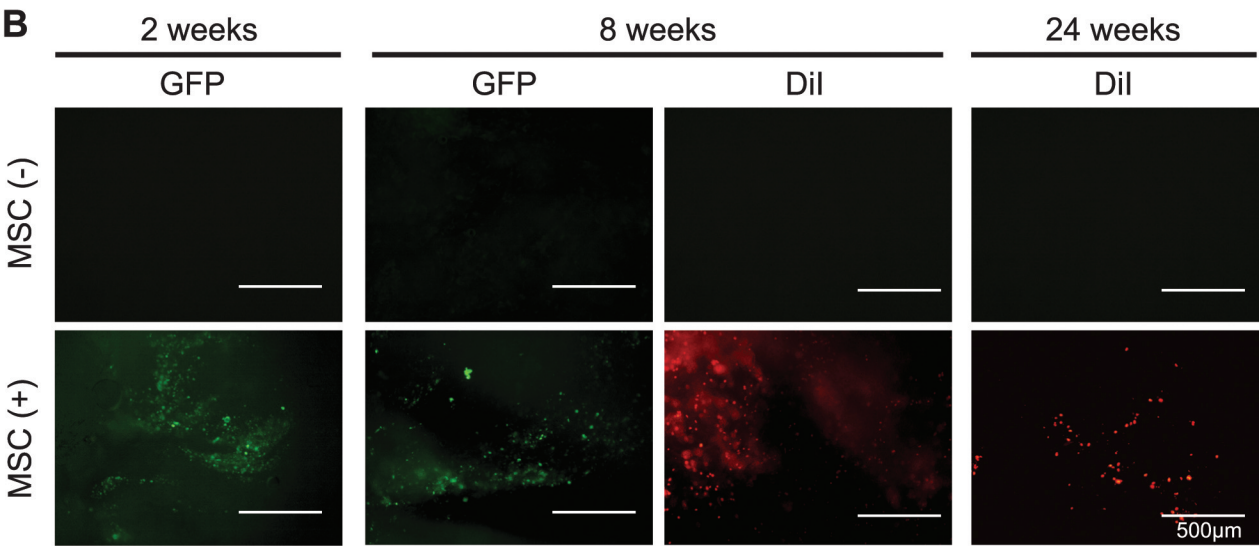

Supplement: MOESM2 [file 9693394]
